# Supplementary material for: Overtone focusing in biphonic tuvan throat singing
Source: eLife journal article supplement (doi:10.7554/elife.50476), 2020-02-12
Supplement: supp [file elife-50476-supp-v1.zip]

Archive with 22 entries (22 files):
- elife_poa_e50476_Appendix_1_figure_11.pdf
- elife_poa_e50476_Appendix_1_figure_20.pdf
- elife_poa_e50476_Appendix_1_figure_9.pdf
- elife_poa_e50476_Appendix_1_figure_7.pdf
- elife_poa_e50476_Appendix_1_figure_2.pdf
- elife_poa_e50476_Appendix_1_figure_18.pdf
- elife_poa_e50476_Appendix_1_figure_17.pdf
- elife_poa_e50476_Appendix_1_figure_21.pdf
- elife_poa_e50476_Appendix_1_figure_13.pdf
- elife_poa_e50476_Appendix_1_figure_16.pdf
- elife_poa_e50476_Appendix_1_figure_14.pdf
- elife_poa_e50476_Appendix_1_figure_1.pdf
- elife_poa_e50476_Appendix_1_figure_15.pdf
- elife_poa_e50476_Appendix_1_figure_19.pdf
- elife_poa_e50476_Appendix_1_figure_5.pdf
- elife_poa_e50476_Appendix_1_figure_6.pdf
- elife_poa_e50476_Appendix_1_figure_8.pdf
- elife_poa_e50476_Appendix_1_figure_3.pdf
- elife_poa_e50476_Appendix_1_figure_12.pdf
- elife_poa_e50476_Appendix_1_figure_10.pdf
- elife_poa_e50476_Transparent_Reporting_File.pdf
- elife_poa_e50476_Appendix_1_figure_4.pdf
