# Supplementary figures and images for: Overtone focusing in biphonic tuvan throat singing
Source: eLife journal article supplement (doi:10.7554/elife.50476), 2020-02-12

T2\_5.wav

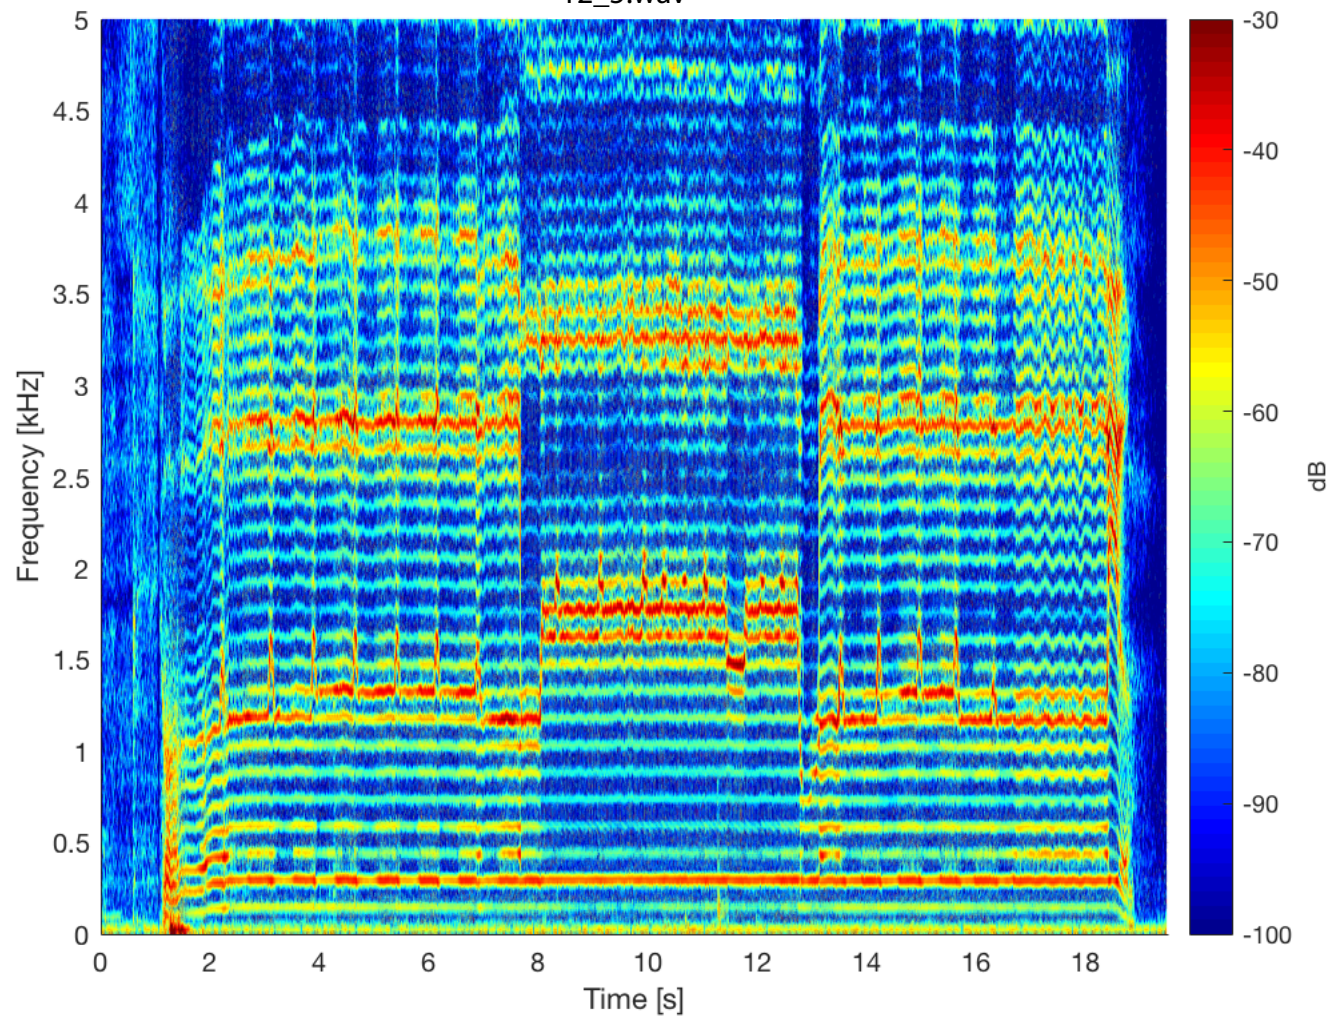

Supplement: supp [file elife-50476-supp-v1.zip]

Non-focused state

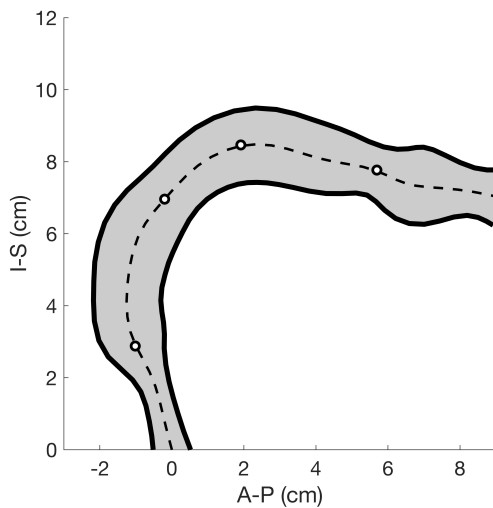

Focused state

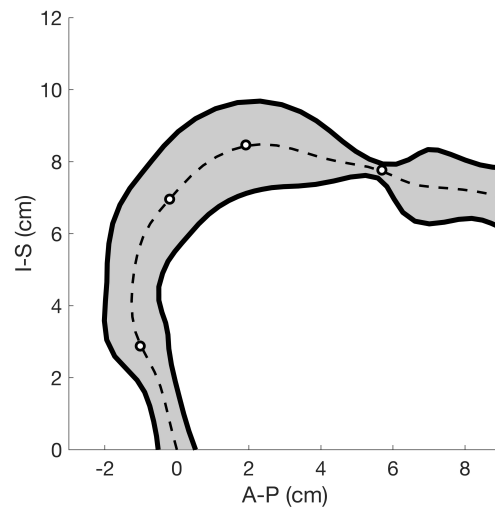

Source

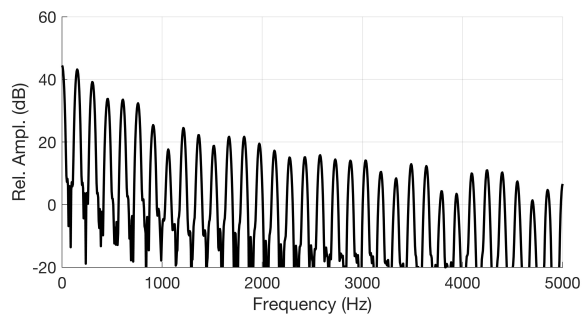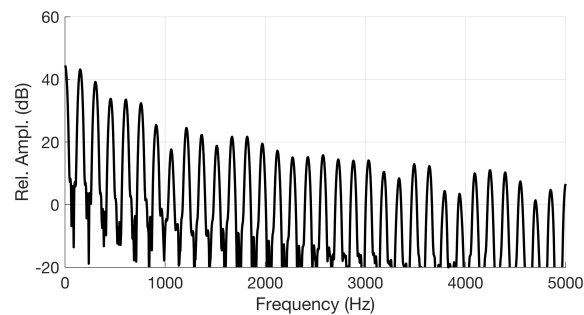

Filter  
+  
Radiation

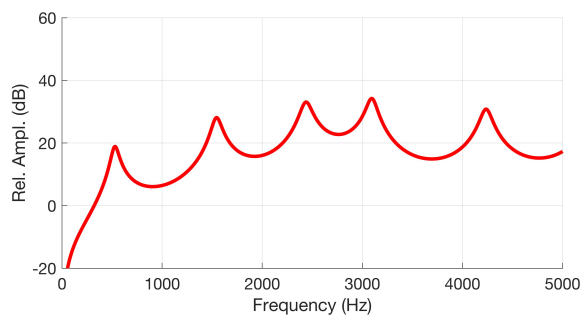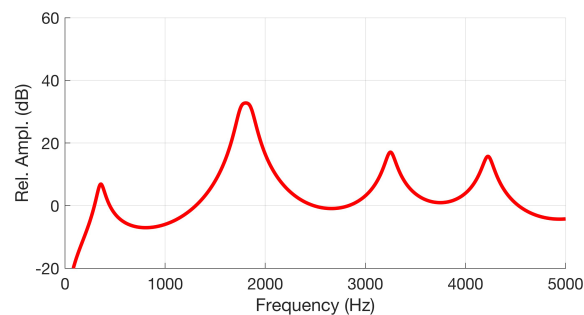

Output

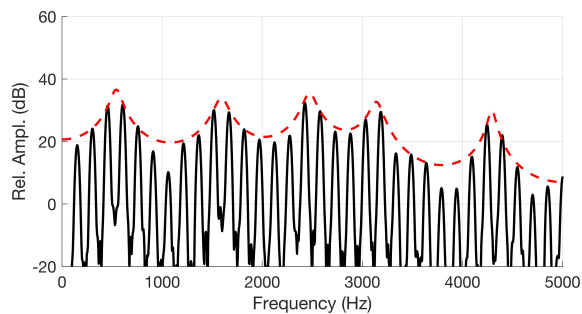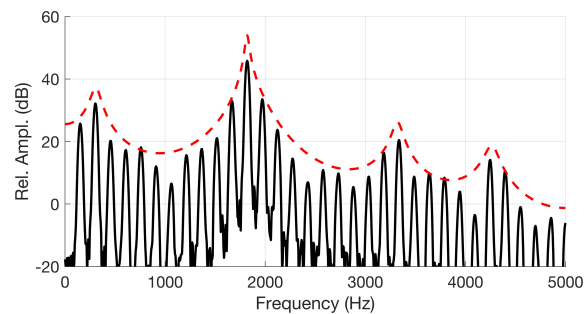

Supplement: supp [file elife-50476-supp-v1.zip]

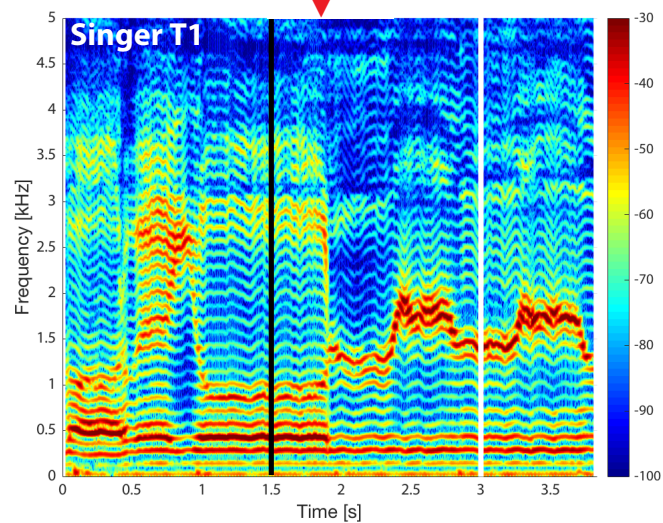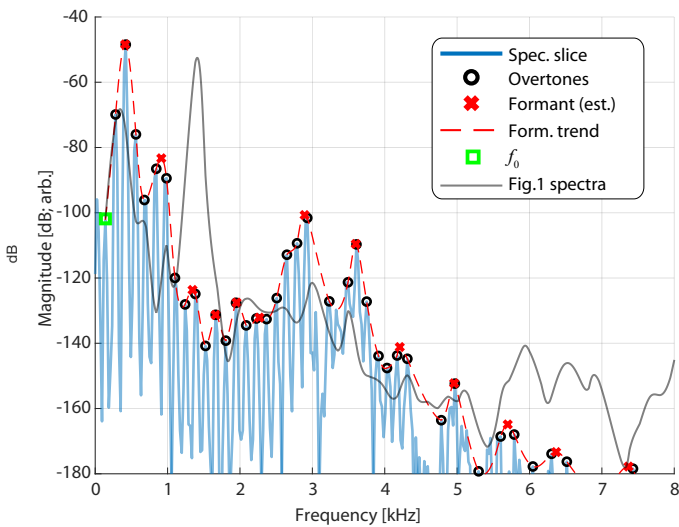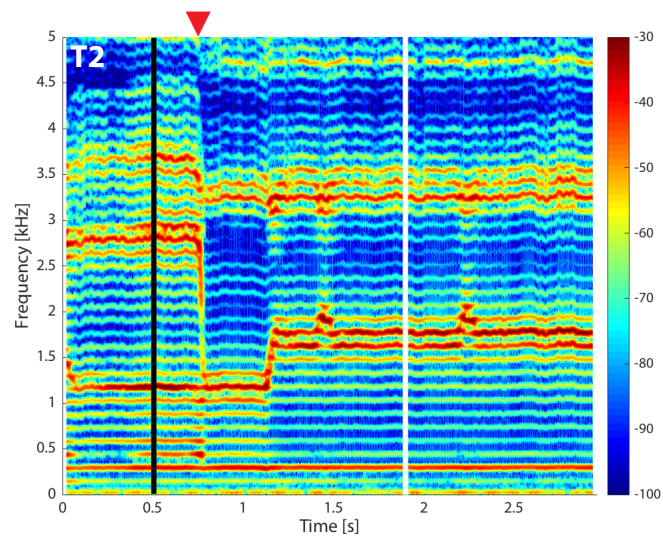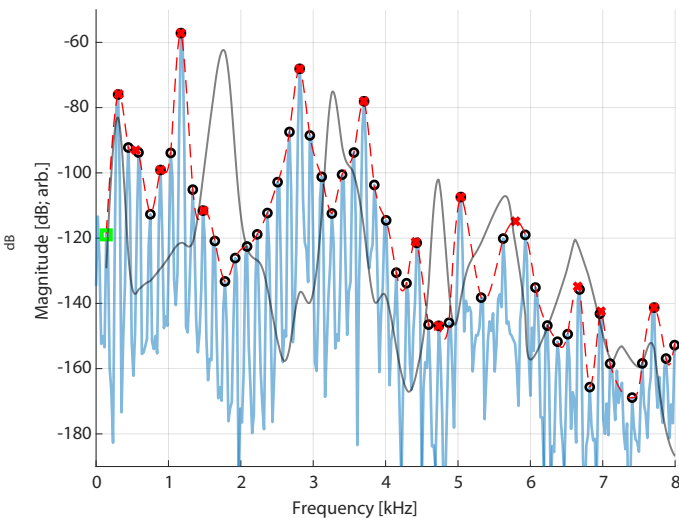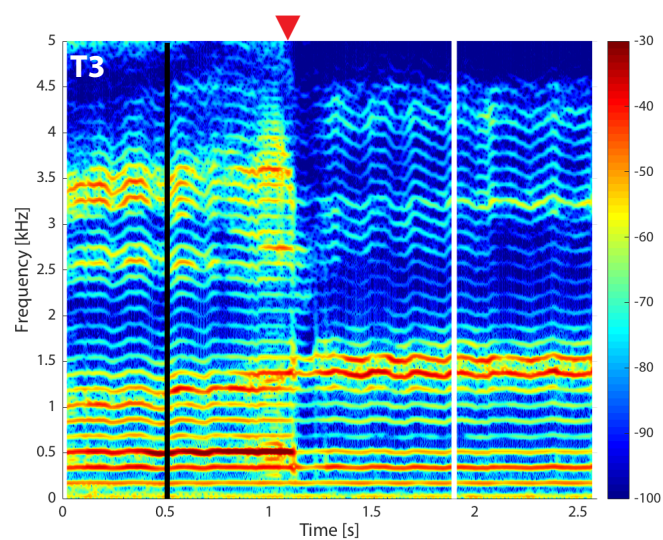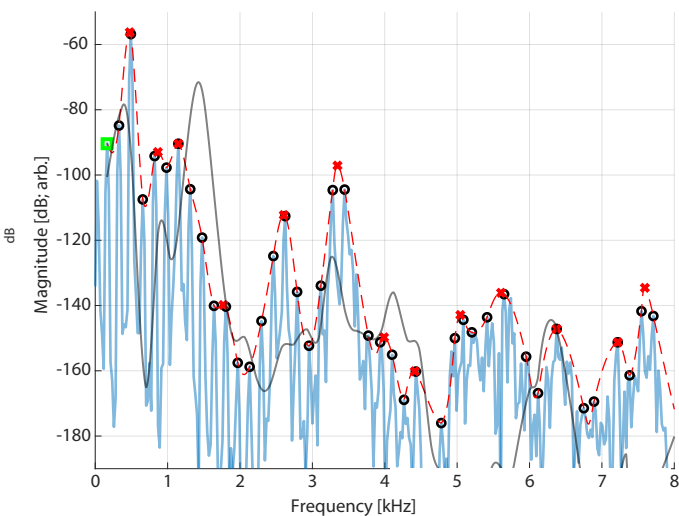

Supplement: supp [file elife-50476-supp-v1.zip]

A

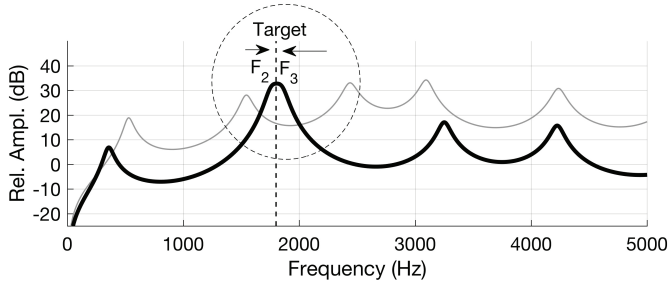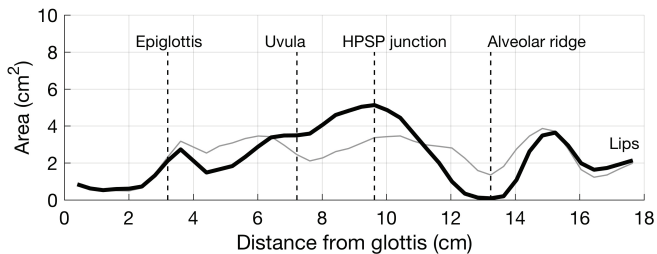

B

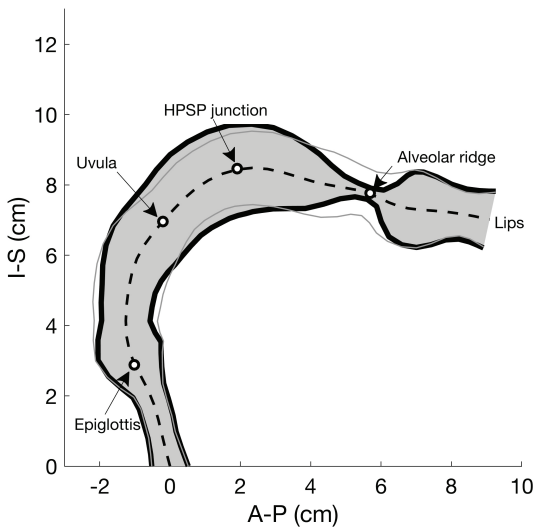

Supplement: supp [file elife-50476-supp-v1.zip]

Estimation of formant dynamics (T2\_5short.wav)

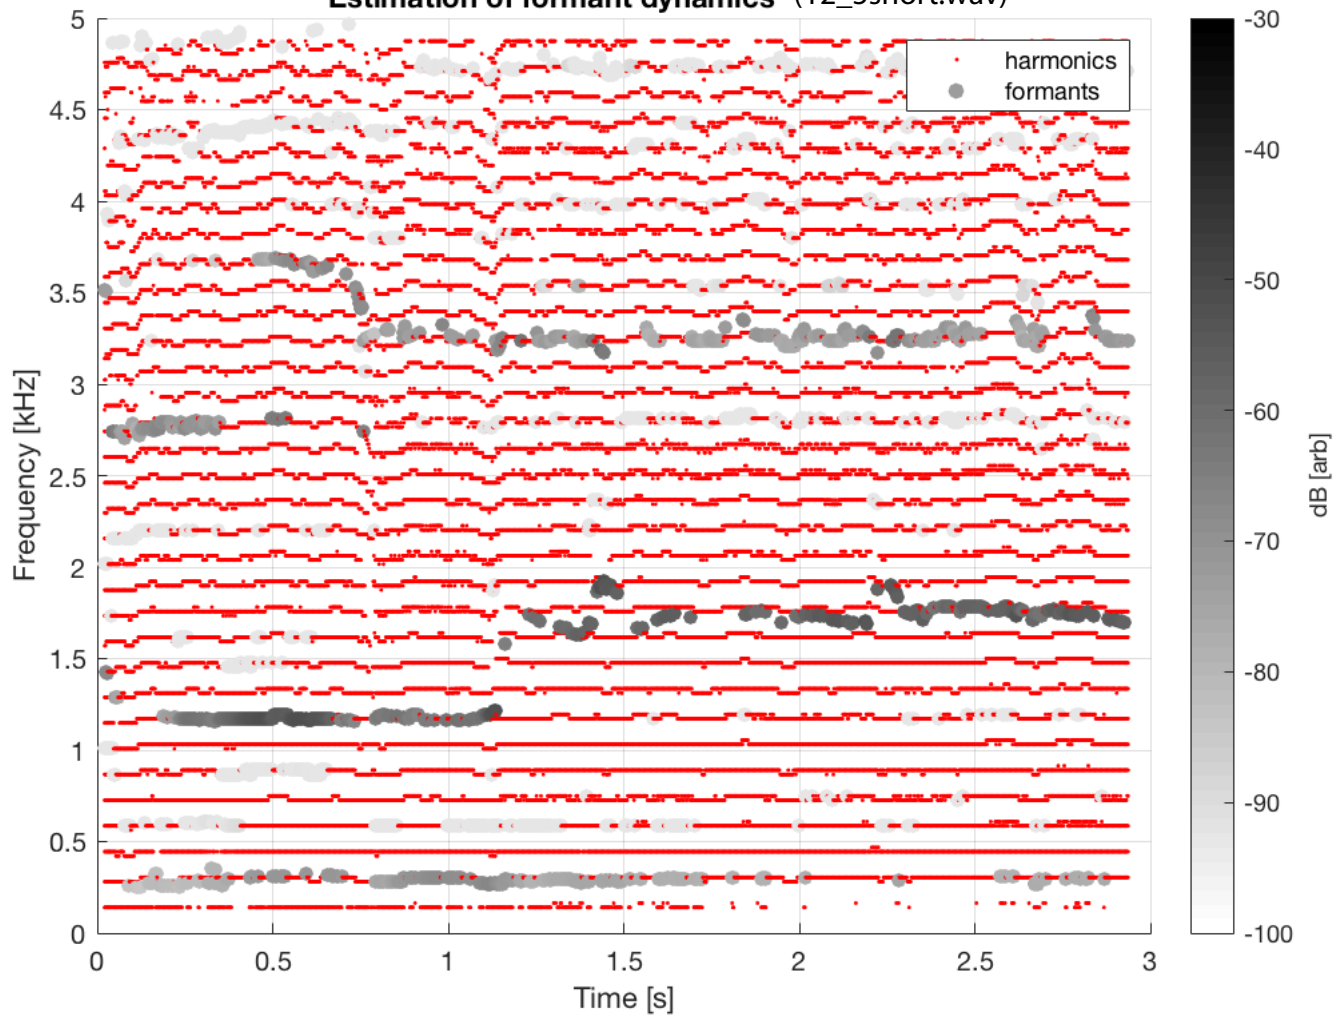

Supplement: supp [file elife-50476-supp-v1.zip]

A

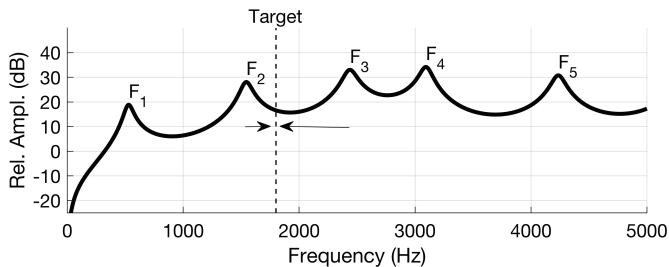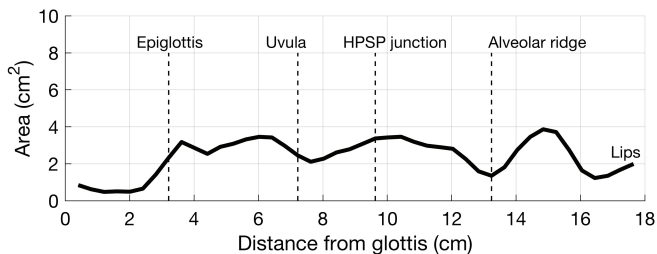

B

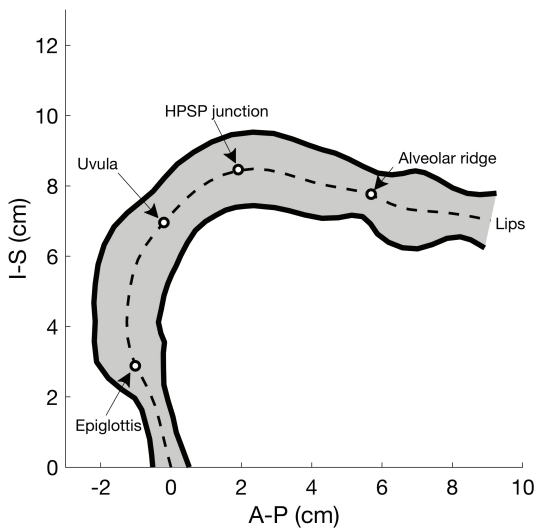

Supplement: supp [file elife-50476-supp-v1.zip]

T2\_2short.wav

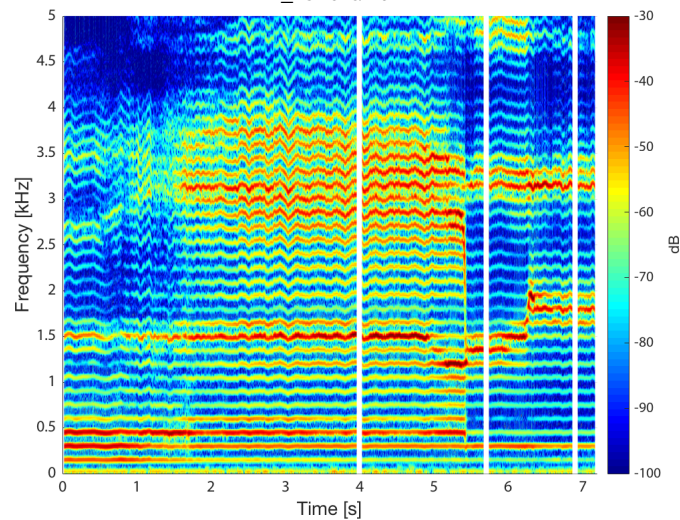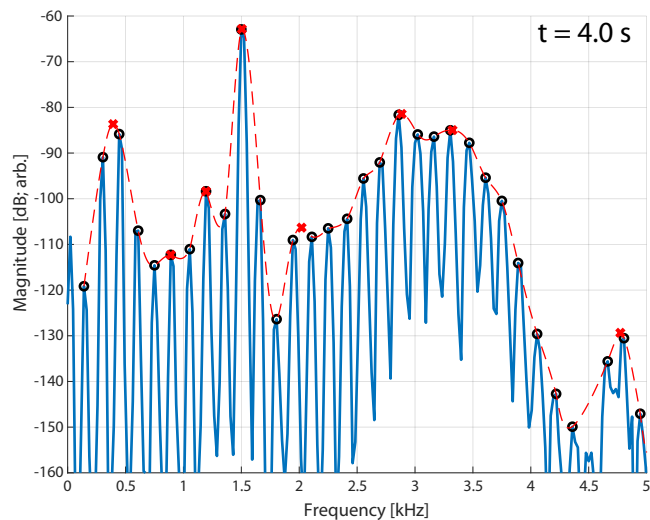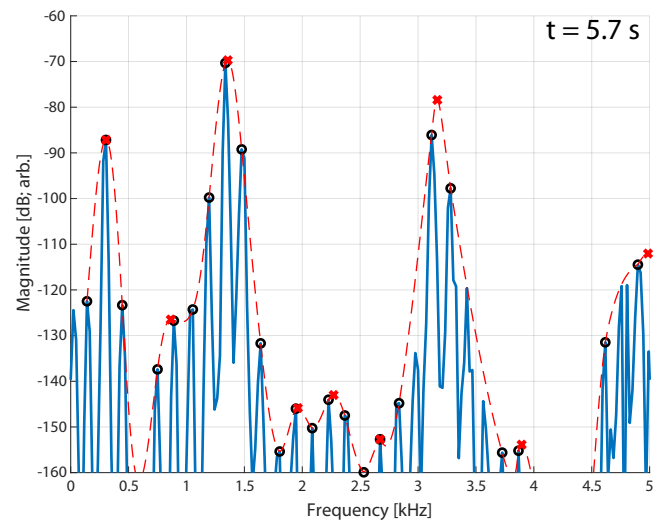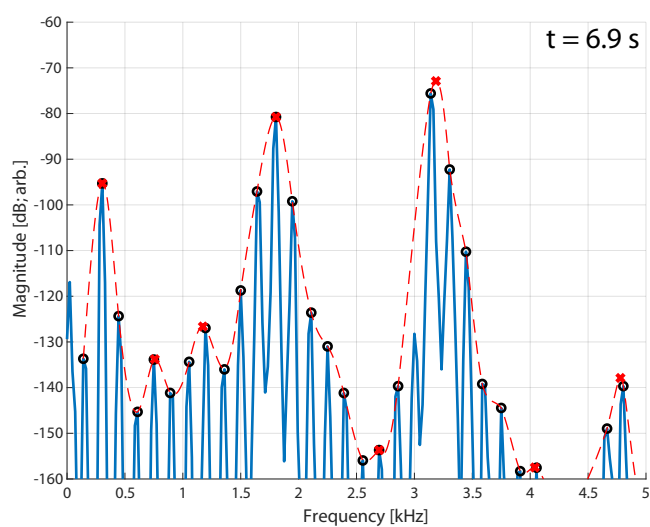

Supplement: supp [file elife-50476-supp-v1.zip]

T2\_1shortB.wav

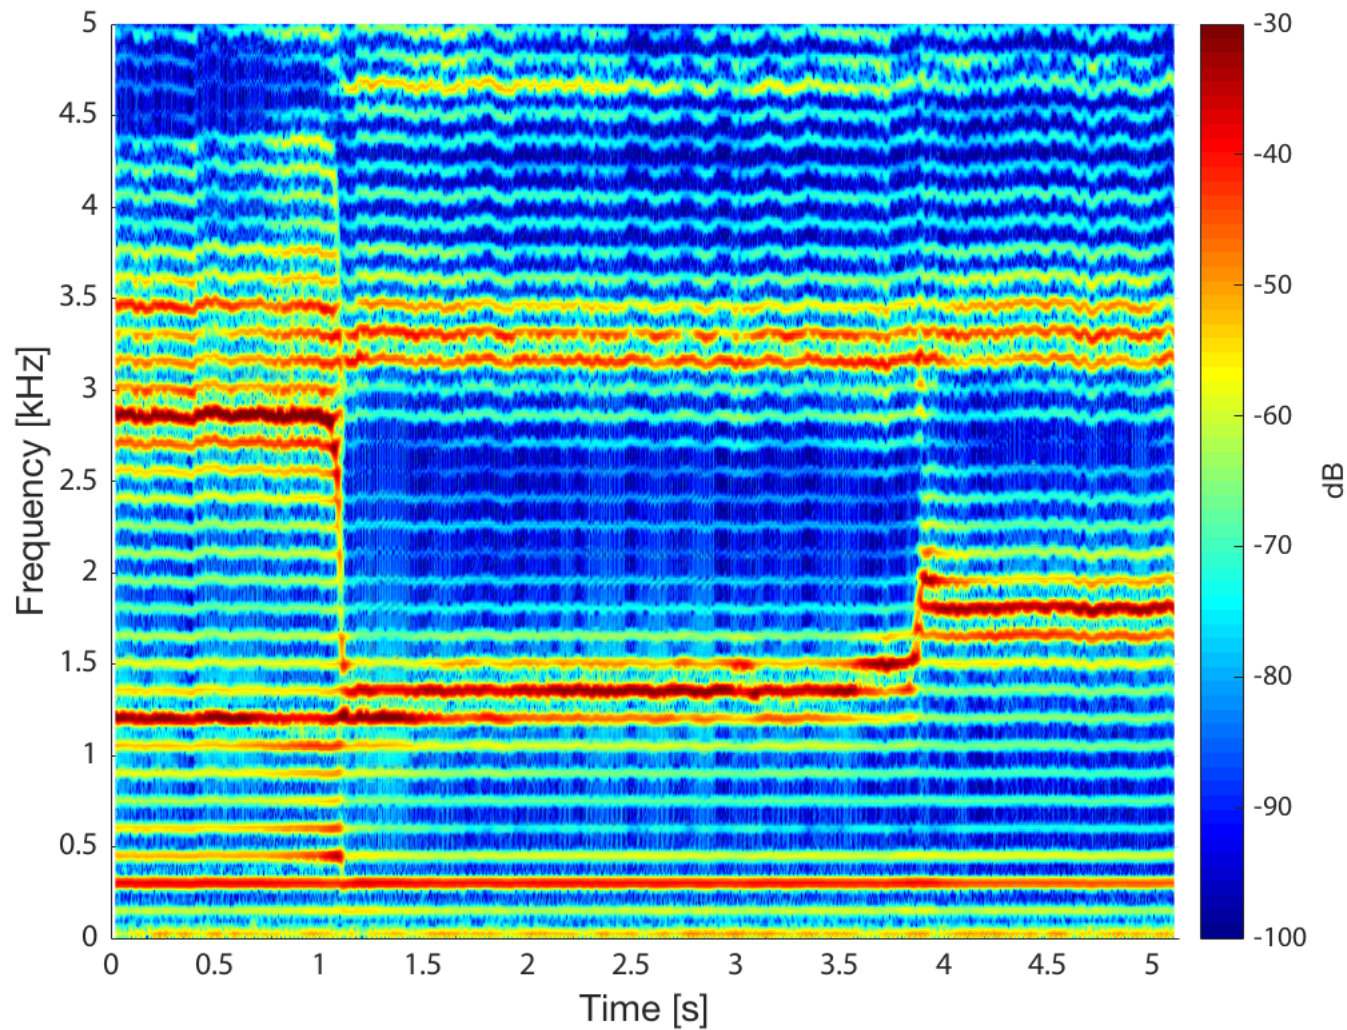

Supplement: supp [file elife-50476-supp-v1.zip]

T1\_3.wav (1st segment)

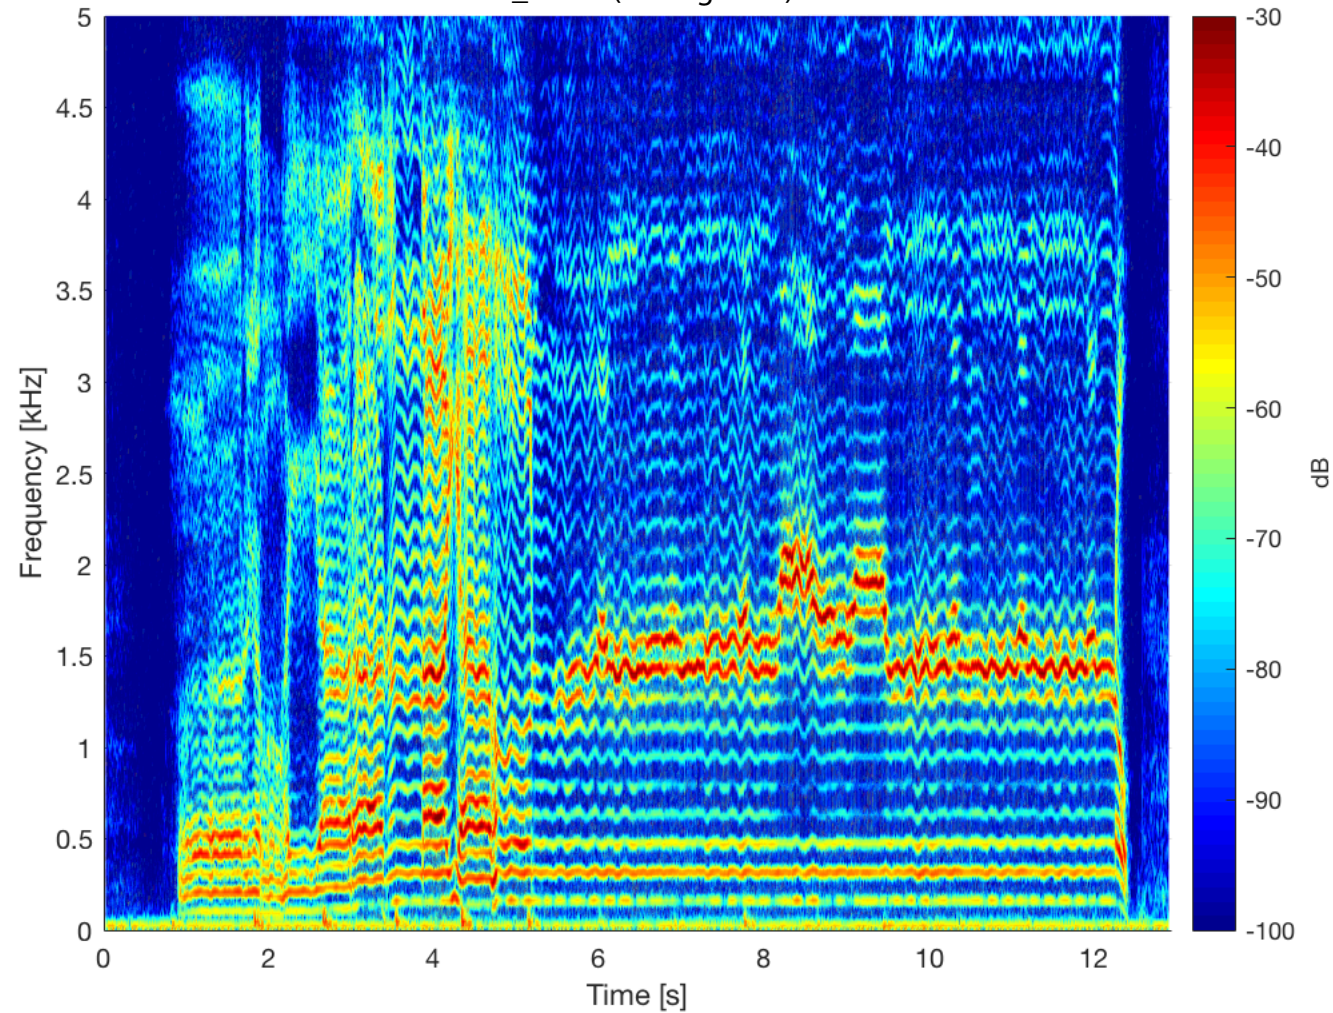

Supplement: supp [file elife-50476-supp-v1.zip]

VolumetricRun3sound.wav time =10-11 s

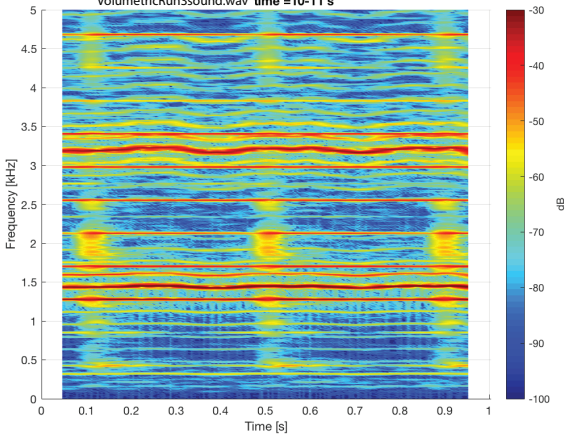

VolumetricRun3sound.wav time =16.5-17.5 s

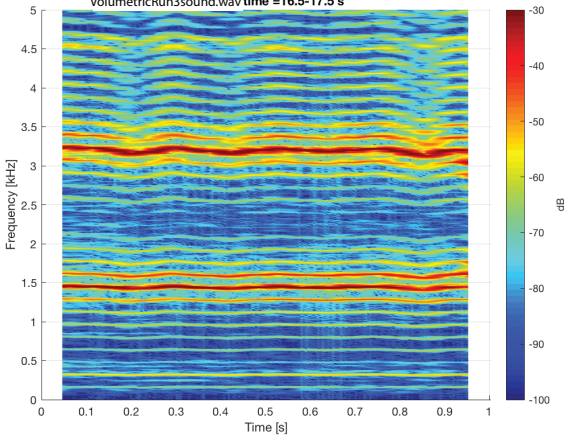

Supplement: supp [file elife-50476-supp-v1.zip]

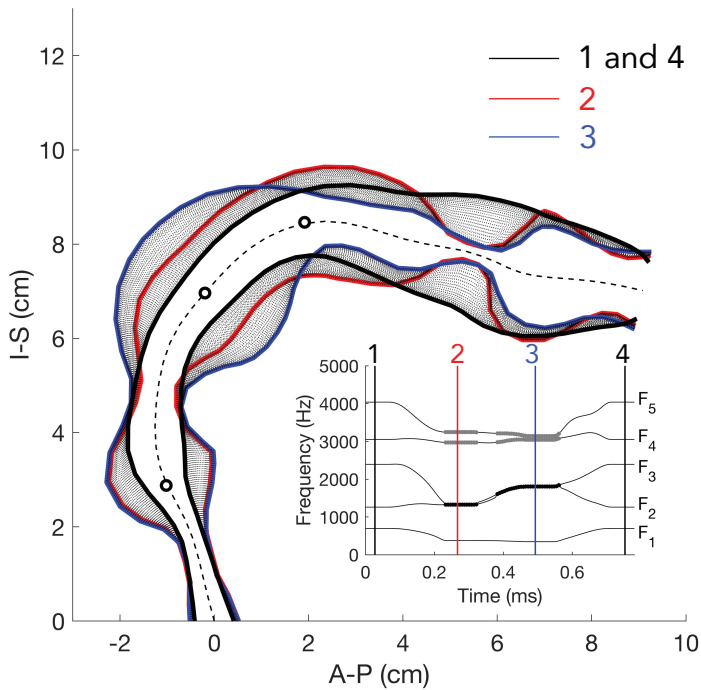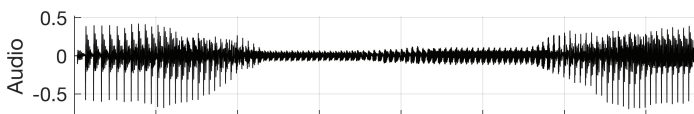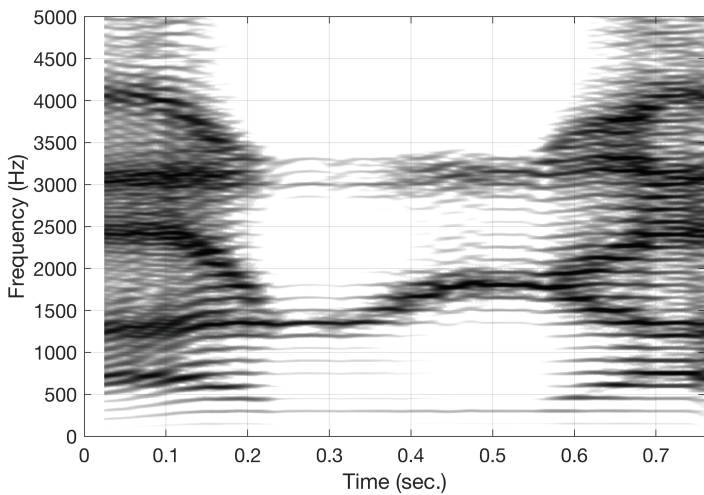

Supplement: supp [file elife-50476-supp-v1.zip]

T2\_1shortA.wav

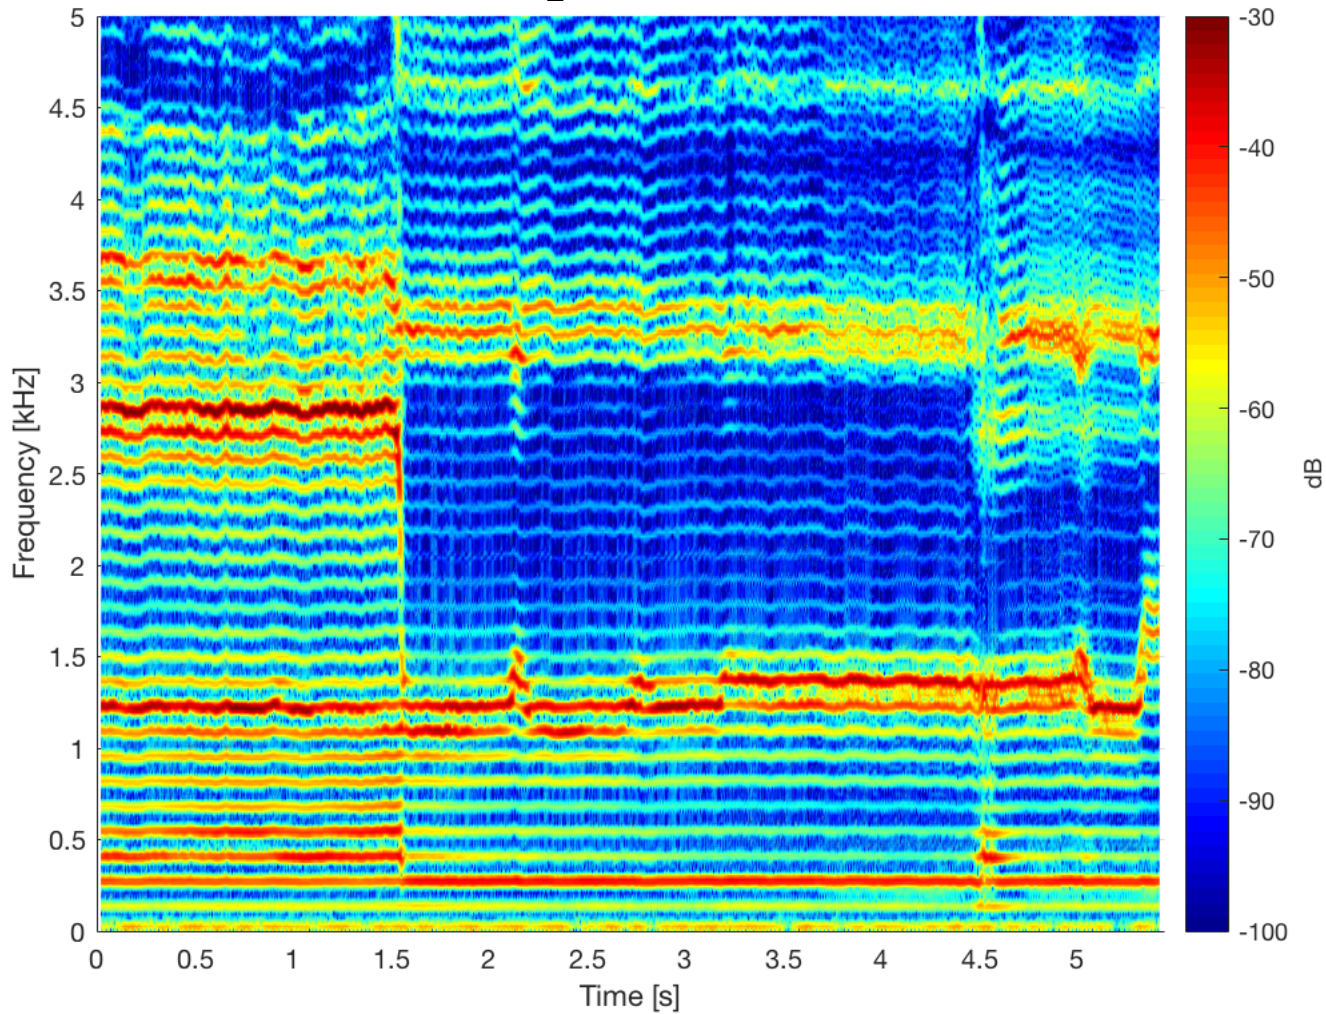

Supplement: supp [file elife-50476-supp-v1.zip]

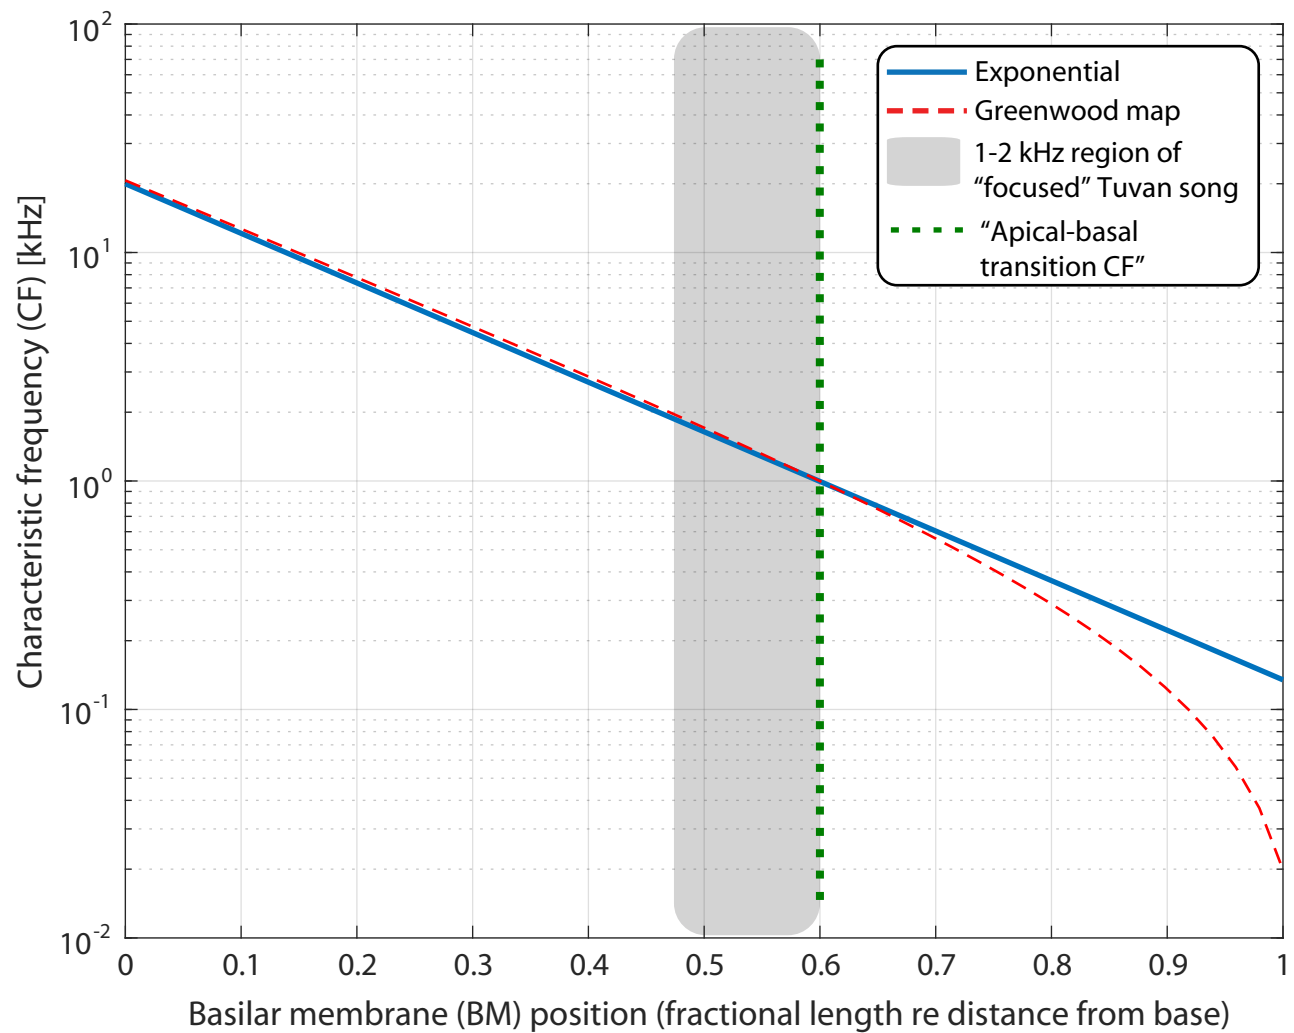

Supplement: supp [file elife-50476-supp-v1.zip]

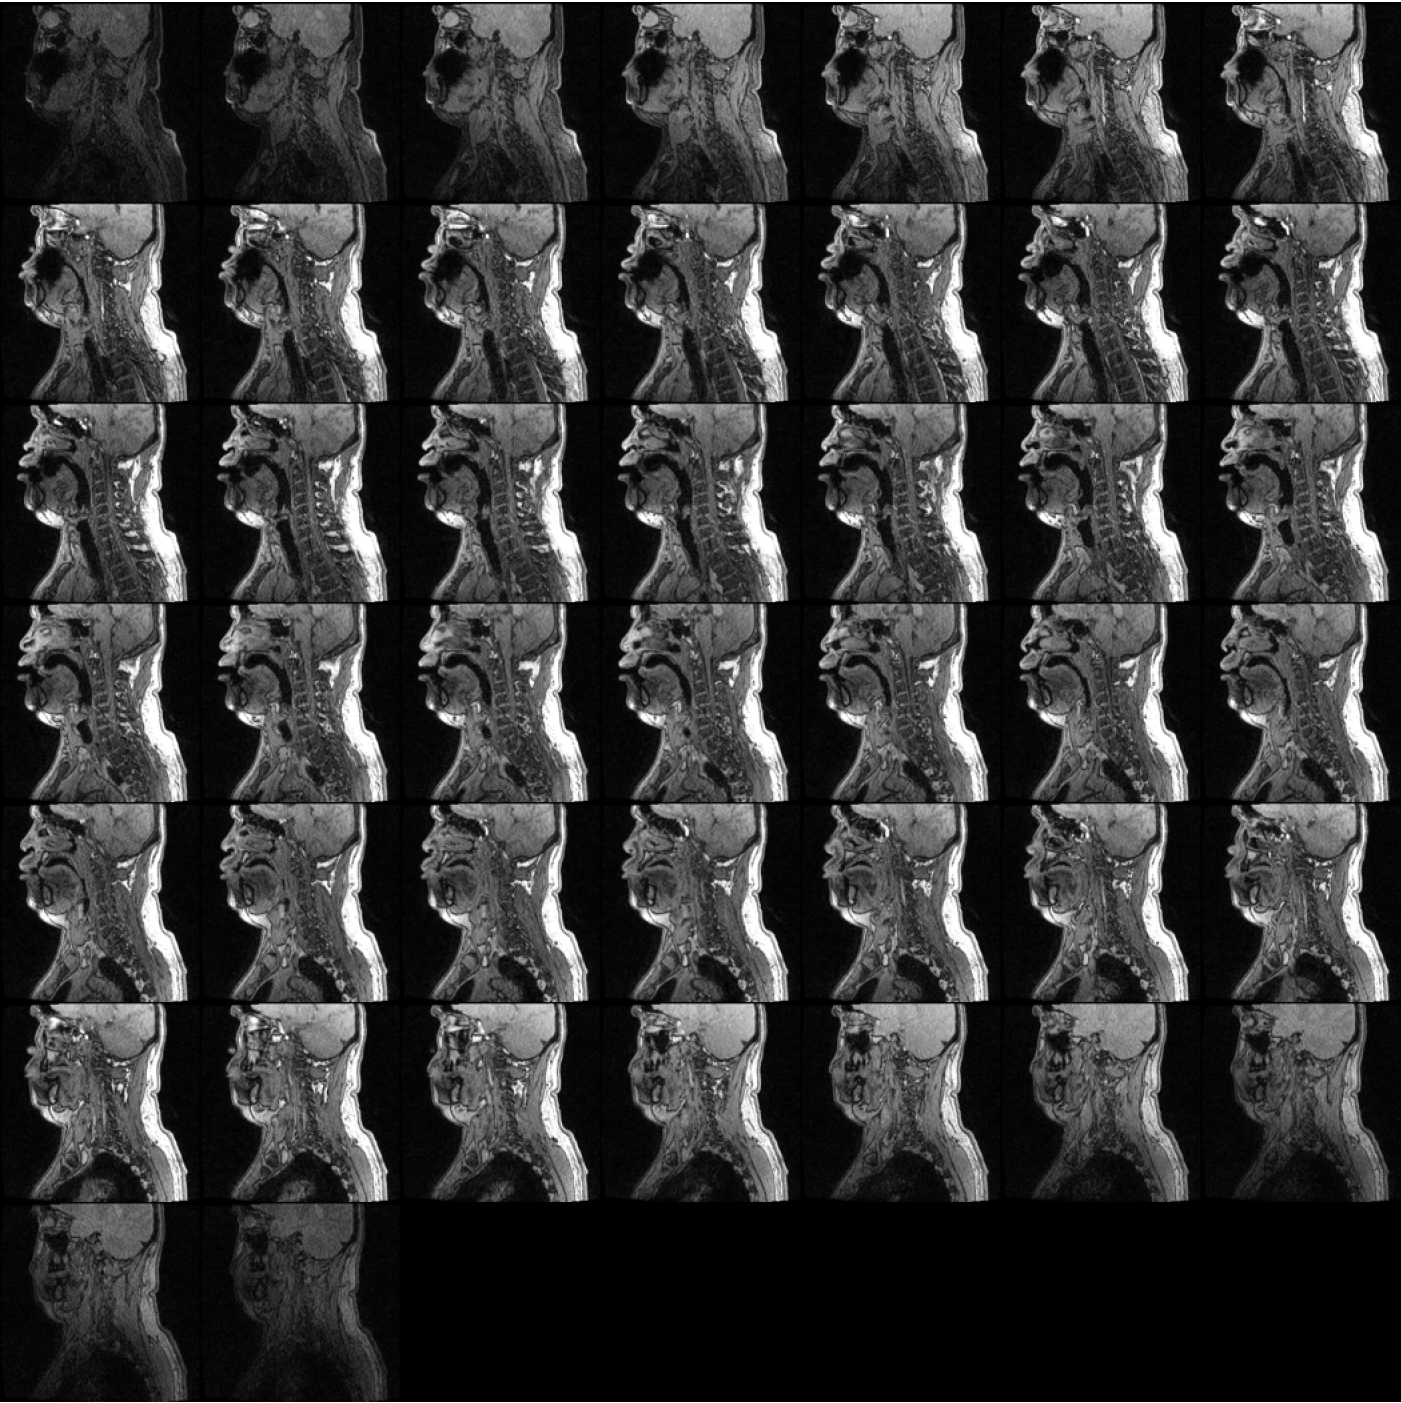

Supplement: supp [file elife-50476-supp-v1.zip]

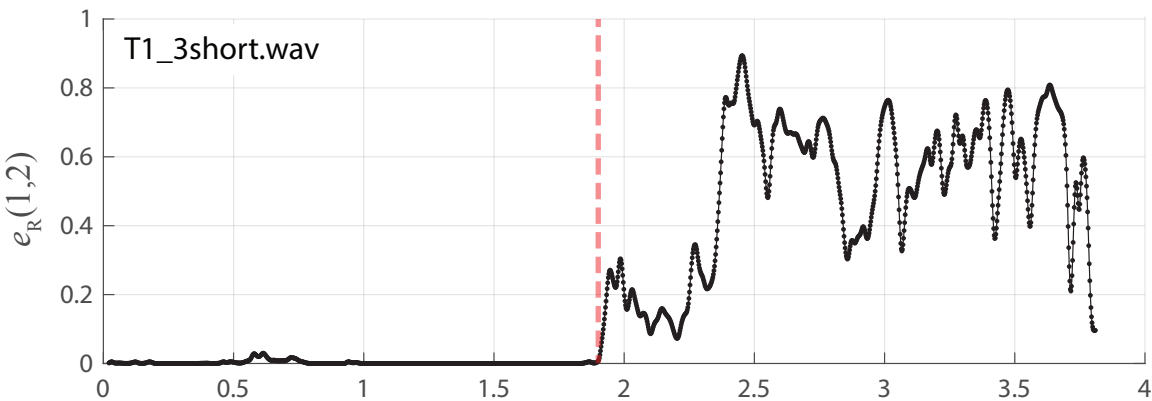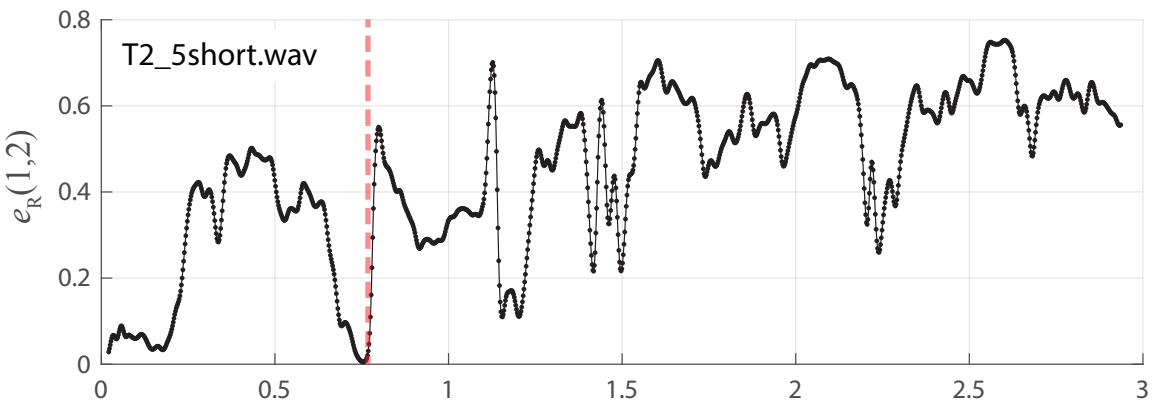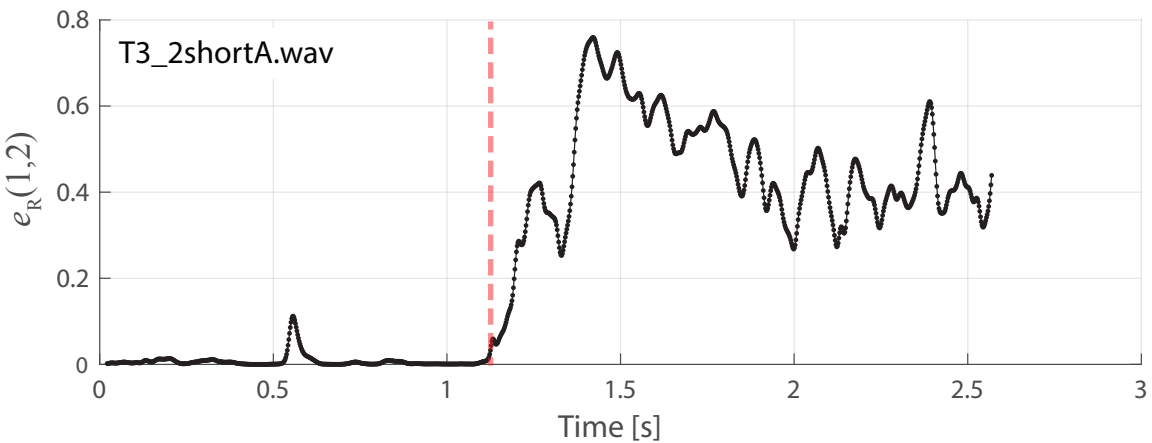

Supplement: supp [file elife-50476-supp-v1.zip]

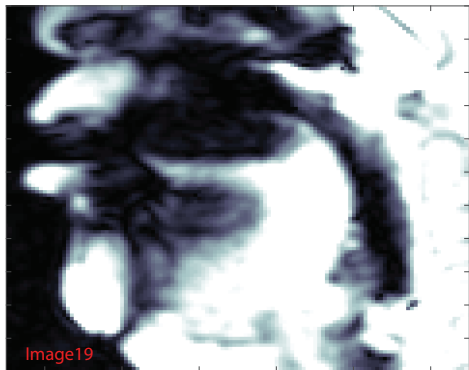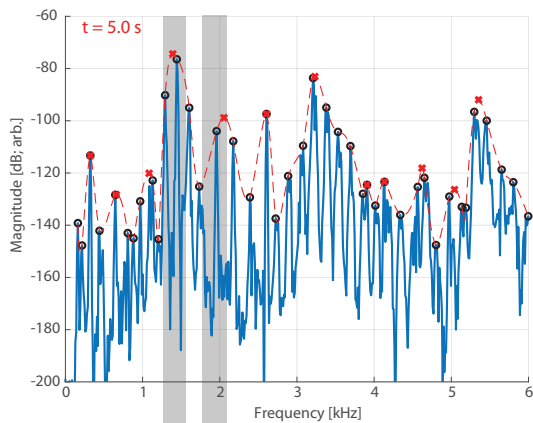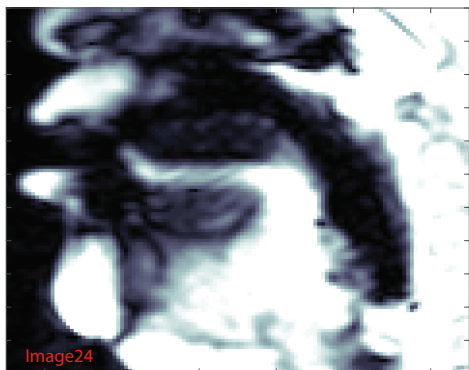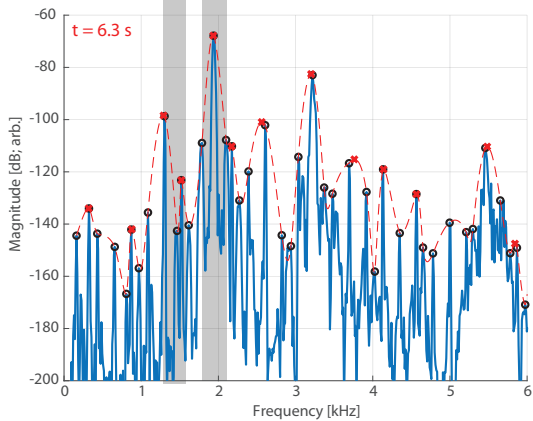

Supplement: supp [file elife-50476-supp-v1.zip]

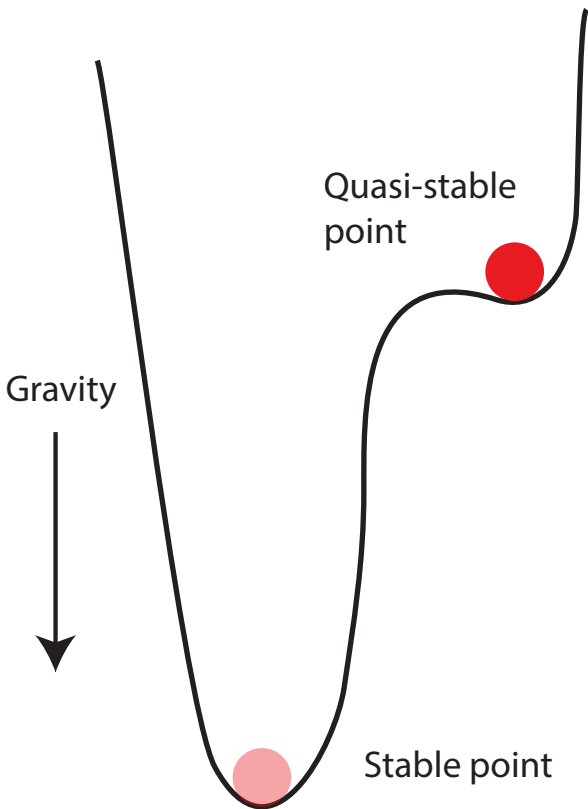

Supplement: supp [file elife-50476-supp-v1.zip › elife_poa_e50476_Appendix_1_figure_17.pdf]

A

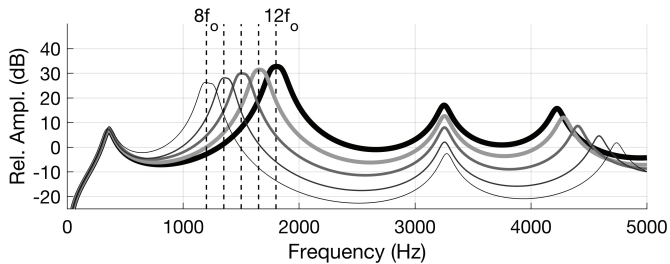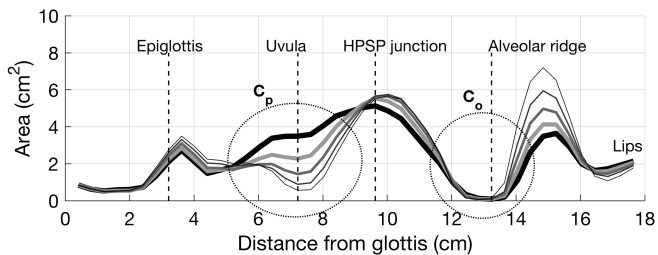

B

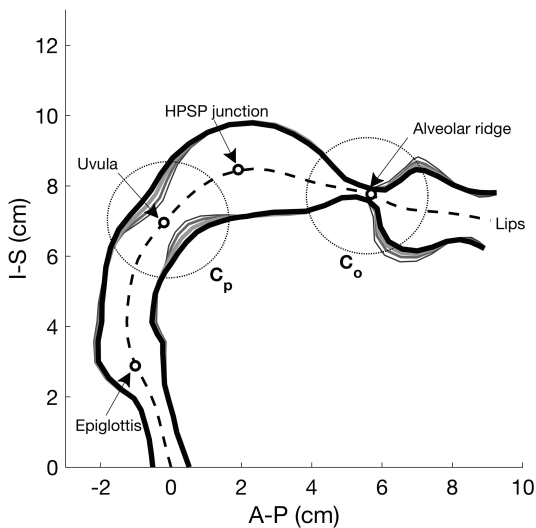

Supplement: supp [file elife-50476-supp-v1.zip › elife_poa_e50476_Appendix_1_figure_13.pdf]

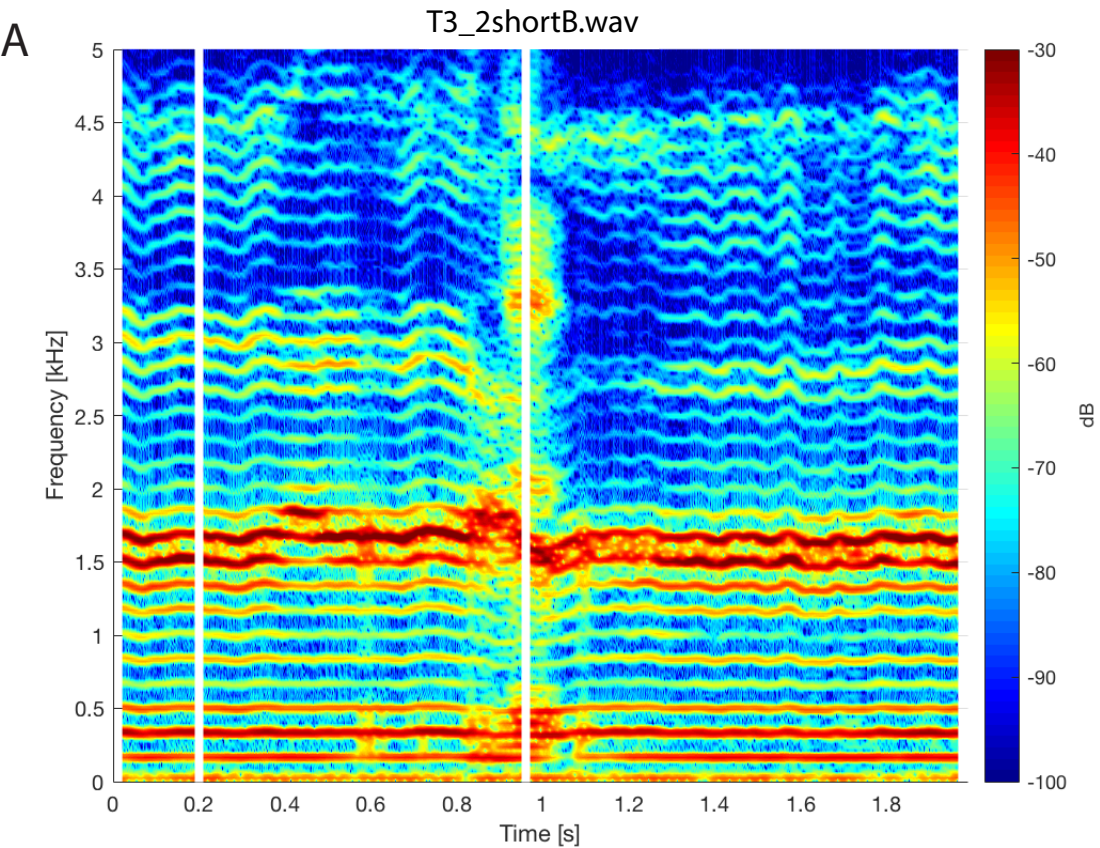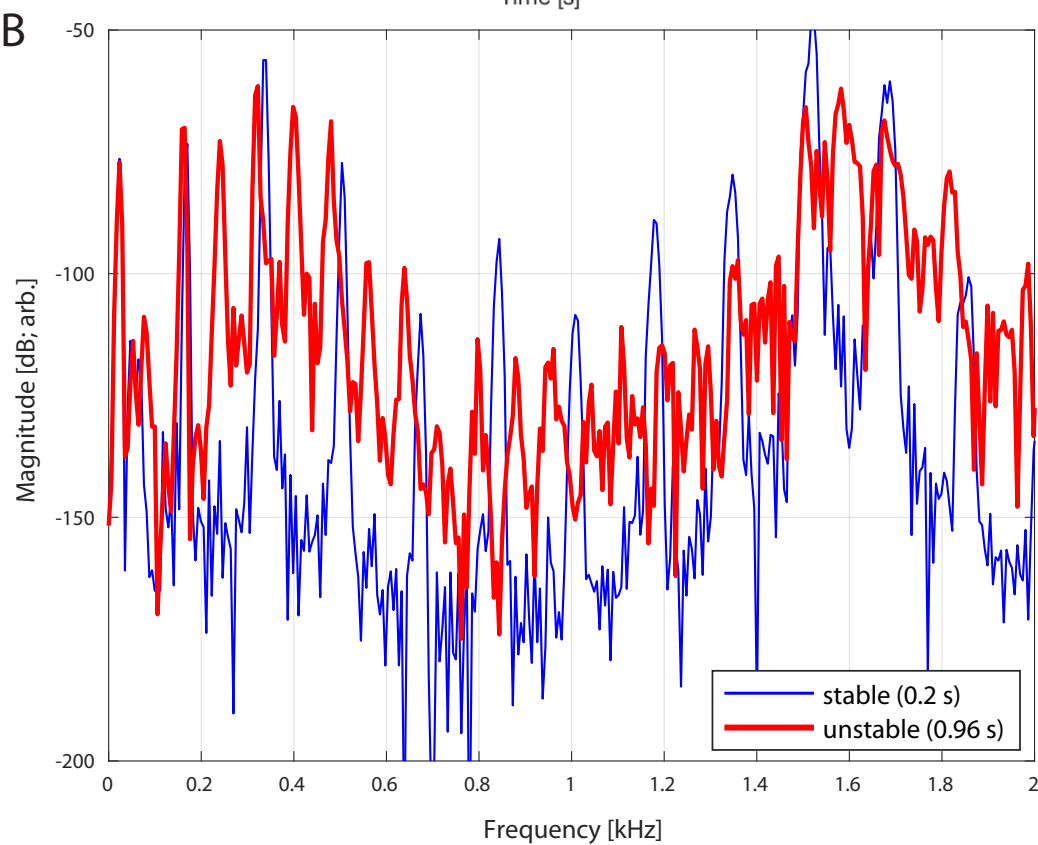

Supplement: supp [file elife-50476-supp-v1.zip › elife_poa_e50476_Appendix_1_figure_15.pdf]

T4\_1shortA.wav

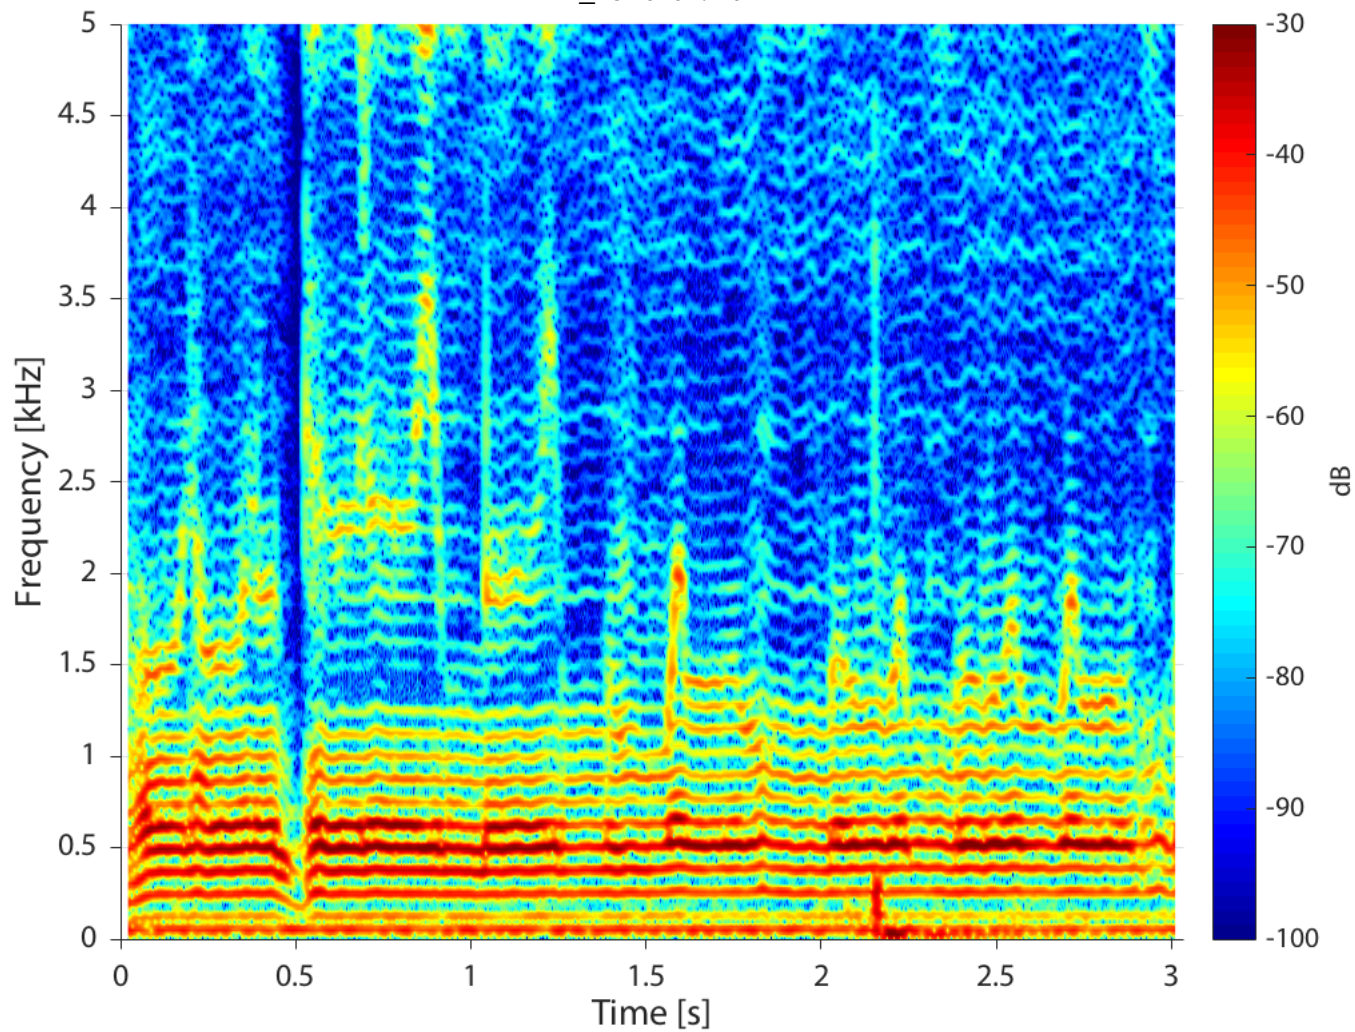

Supplement: supp [file elife-50476-supp-v1.zip › elife_poa_e50476_Appendix_1_figure_5.pdf]

T2\_5longer.wav

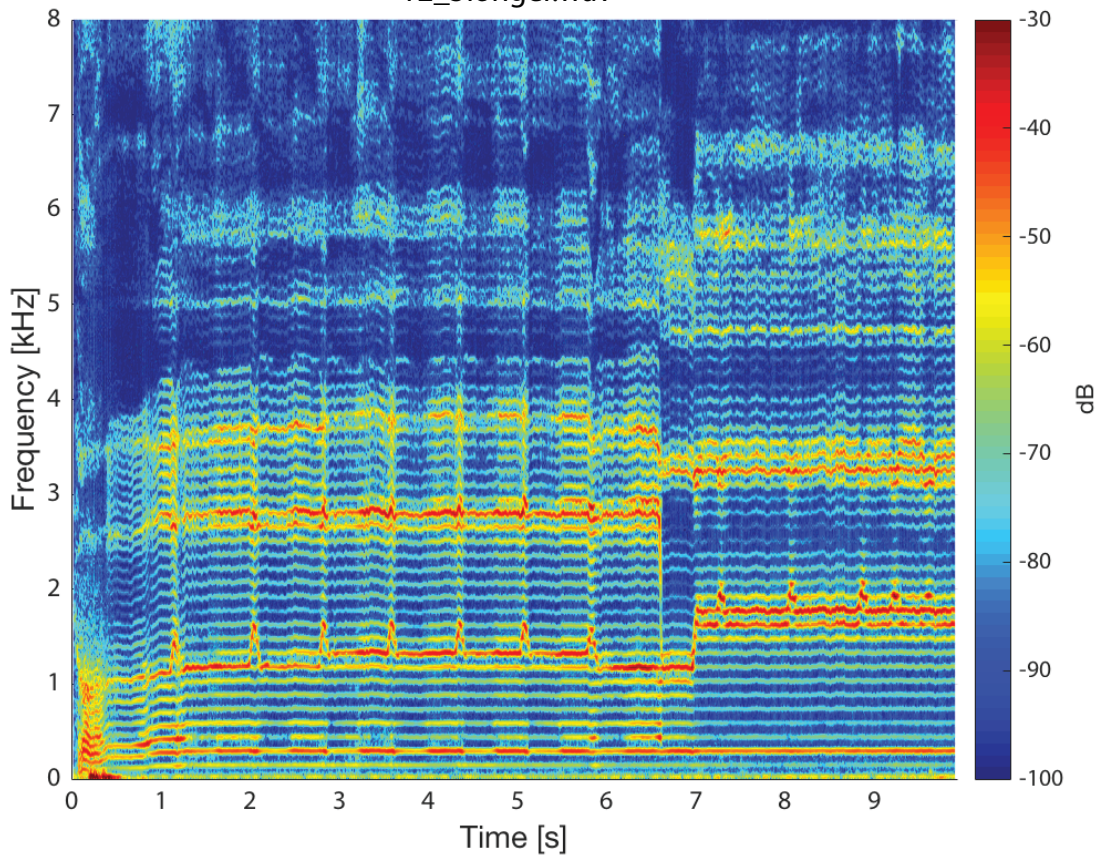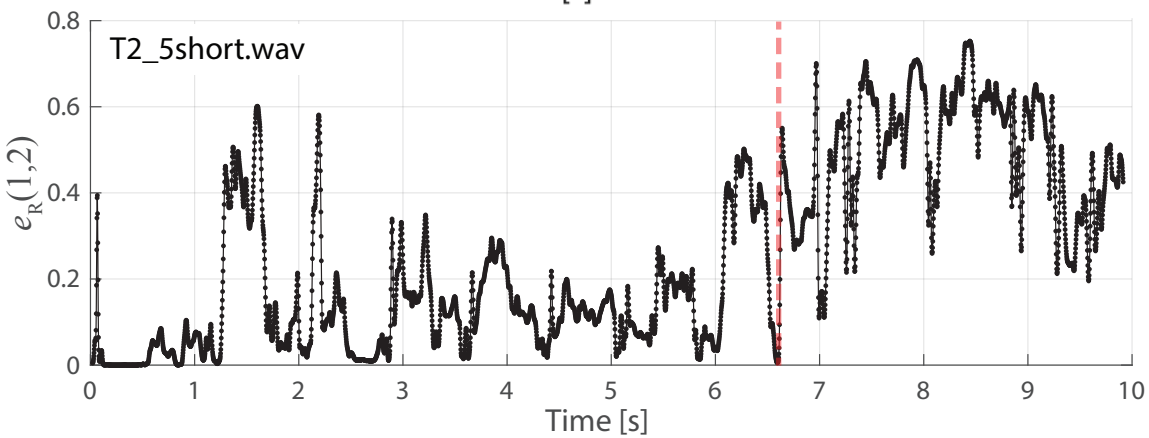

Supplement: supp [file elife-50476-supp-v1.zip › elife_poa_e50476_Appendix_1_figure_3.pdf]
